# Supplementary material
Source: PubMed Central journal article supplement (PMC4122306)

**Supplementary Table 1: clinicopathological characteristics, PDAC cohort.**

| <b>Characteristic</b>                                   | <b>All patients<br/>(n=26)</b> | <b>Weak asTF<br/>(n=5)</b> | <b>Strong asTF<br/>(n=4)</b> |
|---------------------------------------------------------|--------------------------------|----------------------------|------------------------------|
| <b>Median age, years (range)</b>                        | 65 (41-81)                     | 62.5 (56-69)               | 57 (56-78)                   |
| <b>Sex: M/F</b>                                         | 11/15                          | 3/2                        | 3/1                          |
| <b>pT category: T1/2/3</b>                              | 4/0/22                         | 1/0/4                      | 0/0/4                        |
| <b>pN category: N0/1/2</b>                              | 7/18/1                         | 2/3/0                      | 1/3/0                        |
| <b>Histological grade: G1/2/3</b>                       | 1/18/7                         | 0/3/2                      | 0/4/0                        |
| <b>Pathological margin:<br/>involved/uninvolved</b>     | 7/19                           | 2/3                        | 1/3                          |
| <b>Perilymphatic, perivascular invasion:<br/>yes/no</b> | 4/21                           | 1/4                        | 1/3                          |
| <b>Perineural invasion: yes/no</b>                      | 17/9                           | 3/2                        | 4/0                          |
| <b>Recurrence: yes/no</b>                               | 11/15                          | 3/2                        | 1/3                          |
| <b>Median time to recurrence, months<br/>(range)</b>    | 16 (10-22)                     | 21 (16-22)                 | 22                           |

## Figure legend – Supplementary Figure 1

(a) Quantification of vessel density in the PDAC specimens stratified into weak asTF and strong asTF cohorts. (b) Levels of  $\beta 1/\beta 3$  integrins and EGFR on the surface of Pt45P1 and Pt45P1/asTF+ cells (n=3). (c) Total number of microparticles generated by Pt45P1 and Pt45P1/asTF+ cells (n $\geq$ 3). (d) Levels of flTF protein on cell surfaces assessed using on-cell western assay (n=3). (e) Levels of  $\beta 1/\beta 3$  integrins on the surface of MP generated by Pt45P1 and Pt45P1/asTF+ cells (n=3).

## Supplementary Figure 1

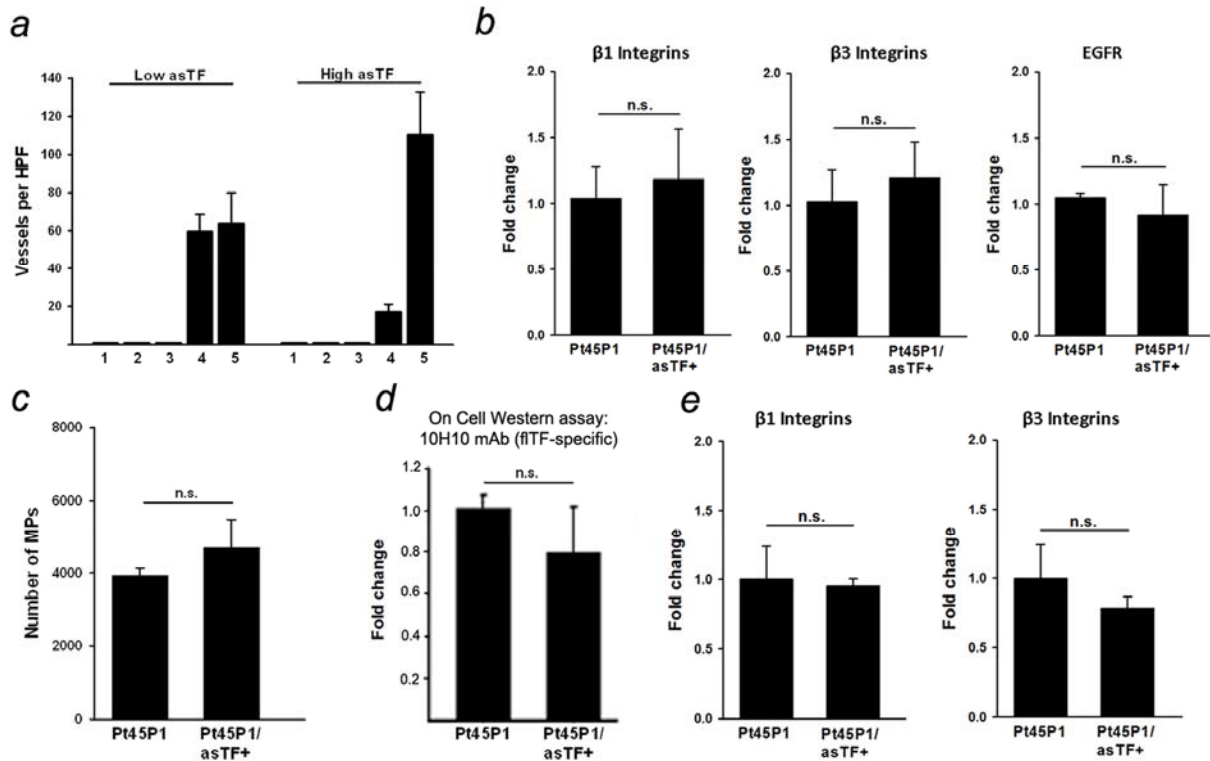

Supplement: NIHMS608341-supplement-Supplementary.pdf [file NIHMS608341-supplement-Supplementary.pdf]
